# Supplementary material for: Effect of Sustainably Sourced Protein Consumption on Nutrient Intake and Gut Health in Older Adults: A Systematic Review
Source: MDPI journal article supplement (doi:10.3390/nu16091398), 2024-05-06
Supplement: s1 [file s1]

**Supplementary Table S1: Prisma Checklist 2020**

| Section and Topic             | Item | Checklist item                                                                                                                                                                                                                                                                                       | Location where item is reported        |
|-------------------------------|------|------------------------------------------------------------------------------------------------------------------------------------------------------------------------------------------------------------------------------------------------------------------------------------------------------|----------------------------------------|
| <b>TITLE</b>                  |      |                                                                                                                                                                                                                                                                                                      |                                        |
| Title                         | 1    | Identify the report as a systematic review.                                                                                                                                                                                                                                                          | Title, Pg1                             |
| <b>ABSTRACT</b>               |      |                                                                                                                                                                                                                                                                                                      |                                        |
| Abstract                      | 2    | See the PRISMA 2020 for Abstracts checklist.                                                                                                                                                                                                                                                         | Pg2, lines 13 - 28                     |
| <b>INTRODUCTION</b>           |      |                                                                                                                                                                                                                                                                                                      |                                        |
| Rationale                     | 3    | Describe the rationale for the review in the context of existing knowledge.                                                                                                                                                                                                                          | Pg1-3                                  |
| Objectives                    | 4    | Provide an explicit statement of the objective(s) or question(s) the review addresses.                                                                                                                                                                                                               | Pg3, lines 127-133                     |
| <b>METHODS</b>                |      |                                                                                                                                                                                                                                                                                                      |                                        |
| Eligibility criteria          | 5    | Specify the inclusion and exclusion criteria for the review and how studies were grouped for the syntheses.                                                                                                                                                                                          | Pg3-4, lines 135-190 and Supp Table S2 |
| Information sources           | 6    | Specify all databases, registers, websites, organisations, reference lists and other sources searched or consulted to identify studies. Specify the date when each source was last searched or consulted.                                                                                            | Pg4-5, lines 191-203 and Supp Table S3 |
| Search strategy               | 7    | Present the full search strategies for all databases, registers and websites, including any filters and limits used.                                                                                                                                                                                 | Pg5, lines 204-208 and Supp Figure S1  |
| Selection process             | 8    | Specify the methods used to decide whether a study met the inclusion criteria of the review, including how many reviewers screened each record and each report retrieved, whether they worked independently, and if applicable, details of automation tools used in the process.                     | Pg5, lines 209-216                     |
| Data collection process       | 9    | Specify the methods used to collect data from reports, including how many reviewers collected data from each report, whether they worked independently, any processes for obtaining or confirming data from study investigators, and if applicable, details of automation tools used in the process. | Pg5, lines 217-224                     |
| Data items                    | 10a  | List and define all outcomes for which data were sought. Specify whether all results that were compatible with each outcome domain in each study were sought (e.g. for all measures, time points, analyses), and if not, the methods used to decide which results to collect.                        | Pg5, lines 225-246                     |
|                               | 10b  | List and define all other variables for which data were sought (e.g. participant and intervention characteristics, funding sources). Describe any assumptions made about any missing or unclear information.                                                                                         | Pg5-6, lines 247-251                   |
| Study risk of bias assessment | 11   | Specify the methods used to assess risk of bias in the included studies, including details of the tool(s) used, how many reviewers assessed each study and whether they worked independently, and if applicable, details of automation tools used in the process.                                    | Pg6, lines 252-264                     |
| Effect measures               | 12   | Specify for each outcome the effect measure(s) (e.g. risk ratio, mean difference) used in the synthesis or presentation of results.                                                                                                                                                                  | Pg6, lines 265-269                     |
| Synthesis methods             | 13a  | Describe the processes used to decide which studies were eligible for each synthesis (e.g. tabulating the study intervention characteristics and comparing against the planned groups for each synthesis (item #5)).                                                                                 | Narrative review                       |
|                               | 13b  | Describe any methods required to prepare the data for presentation or synthesis, such as handling of missing summary statistics, or data conversions.                                                                                                                                                | Narrative review                       |
|                               | 13c  | Describe any methods used to tabulate or visually display results of individual studies and syntheses.                                                                                                                                                                                               | Narrative review                       |
|                               | 13d  | Describe any methods used to synthesize results and provide a rationale for                                                                                                                                                                                                                          | Narrative                              |

| Section and Topic             | Item | Checklist item                                                                                                                                                                                                                                                                       | Location where item is reported                        |
|-------------------------------|------|--------------------------------------------------------------------------------------------------------------------------------------------------------------------------------------------------------------------------------------------------------------------------------------|--------------------------------------------------------|
|                               |      | the choice(s). If meta-analysis was performed, describe the model(s), method(s) to identify the presence and extent of statistical heterogeneity, and software package(s) used.                                                                                                      | review                                                 |
|                               | 13e  | Describe any methods used to explore possible causes of heterogeneity among study results (e.g. subgroup analysis, meta-regression).                                                                                                                                                 | Narrative review                                       |
|                               | 13f  | Describe any sensitivity analyses conducted to assess robustness of the synthesized results.                                                                                                                                                                                         | Narrative review                                       |
| Reporting bias assessment     | 14   | Describe any methods used to assess risk of bias due to missing results in a synthesis (arising from reporting biases).                                                                                                                                                              | Pg6, lines 267-268                                     |
| Certainty assessment          | 15   | Describe any methods used to assess certainty (or confidence) in the body of evidence for an outcome.                                                                                                                                                                                | Pg6, lines 267-268                                     |
| <b>RESULTS</b>                |      |                                                                                                                                                                                                                                                                                      |                                                        |
| Study selection               | 16a  | Describe the results of the search and selection process, from the number of records identified in the search to the number of studies included in the review, ideally using a flow diagram.                                                                                         | Pg6, lines 271-281 and Fig 1                           |
|                               | 16b  | Cite studies that might appear to meet the inclusion criteria, but which were excluded, and explain why they were excluded.                                                                                                                                                          | Pg6, lines 278-279 and Fig 1                           |
| Study characteristics         | 17   | Cite each included study and present its characteristics.                                                                                                                                                                                                                            | Pg7-10, lines 284-340 and Tables 1&2                   |
| Risk of bias in studies       | 18   | Present assessments of risk of bias for each included study.                                                                                                                                                                                                                         | Pg12-13, lines 350-390 and Table 3                     |
| Results of individual studies | 19   | For all outcomes, present, for each study: (a) summary statistics for each group (where appropriate) and (b) an effect estimate and its precision (e.g. confidence/credible interval), ideally using structured tables or plots.                                                     | Pg13-20, lines 391-563, Tables 4,5&6 and Supp Table S4 |
| Results of syntheses          | 20a  | For each synthesis, briefly summarise the characteristics and risk of bias among contributing studies.                                                                                                                                                                               | Narrative review                                       |
|                               | 20b  | Present results of all statistical syntheses conducted. If meta-analysis was done, present for each the summary estimate and its precision (e.g. confidence/credible interval) and measures of statistical heterogeneity. If comparing groups, describe the direction of the effect. | Narrative review                                       |
|                               | 20c  | Present results of all investigations of possible causes of heterogeneity among study results.                                                                                                                                                                                       | Narrative review                                       |
|                               | 20d  | Present results of all sensitivity analyses conducted to assess the robustness of the synthesized results.                                                                                                                                                                           | Narrative review                                       |
| Reporting biases              | 21   | Present assessments of risk of bias due to missing results (arising from reporting biases) for each synthesis assessed.                                                                                                                                                              | Narrative review                                       |
| Certainty of evidence         | 22   | Present assessments of certainty (or confidence) in the body of evidence for each outcome assessed.                                                                                                                                                                                  | Narrative review                                       |
| <b>DISCUSSION</b>             |      |                                                                                                                                                                                                                                                                                      |                                                        |
| Discussion                    | 23a  | Provide a general interpretation of the results in the context of other evidence.                                                                                                                                                                                                    | Pg20-22, lines 564-676                                 |
|                               | 23b  | Discuss any limitations of the evidence included in the review.                                                                                                                                                                                                                      | Pg22, lines 677-689                                    |
|                               | 23c  | Discuss any limitations of the review processes used.                                                                                                                                                                                                                                | Pg22, lines 677-689                                    |
|                               | 23d  | Discuss implications of the results for practice, policy, and future research.                                                                                                                                                                                                       | Pg22, lines 690-702                                    |
| <b>OTHER INFORMATION</b>      |      |                                                                                                                                                                                                                                                                                      |                                                        |

| Section and Topic                              | Item | Checklist item                                                                                                                                                                                                                             | Location where item is reported                            |
|------------------------------------------------|------|--------------------------------------------------------------------------------------------------------------------------------------------------------------------------------------------------------------------------------------------|------------------------------------------------------------|
| Registration and protocol                      | 24a  | Provide registration information for the review, including register name and registration number, or state that the review was not registered.                                                                                             | Pg22, lines 703-707                                        |
|                                                | 24b  | Indicate where the review protocol can be accessed, or state that a protocol was not prepared.                                                                                                                                             | Pg22, lines 703-707                                        |
|                                                | 24c  | Describe and explain any amendments to information provided at registration or in the protocol.                                                                                                                                            | Pg22, lines 703-707                                        |
| Support                                        | 25   | Describe sources of financial or non-financial support for the review, and the role of the funders or sponsors in the review.                                                                                                              | Pg22, lines 717-718                                        |
| Competing interests                            | 26   | Declare any competing interests of review authors.                                                                                                                                                                                         | Pg23, line 725                                             |
| Availability of data, code and other materials | 27   | Report which of the following are publicly available and where they can be found: template data collection forms; data extracted from included studies; data used for all analyses; analytic code; any other materials used in the review. | Pg23, lines 719-722, Tables 1-6 and supplementary material |

From: Page MJ, McKenzie JE, Bossuyt PM, Boutron I, Hoffmann TC, Mulrow CD, et al. The PRISMA 2020 statement: an updated guideline for reporting systematic reviews. BMJ 2021;372:n71. doi: 10.1136/bmj.n71

#### Supplementary Table S2: Inclusion and exclusion criteria for screening articles

The aim of this systematic review is to evaluate the literature on the effect of consumption of sustainable proteins compared to non-sustainable or meat-based proteins on nutrient intake, gut health and age-related changes in healthy, community-dwelling individuals aged 65 years or over.

|                     | Inclusion criteria                                                                                                                                                                                                                                                                                                                                                                                                                                                                                                                                   | Exclusion criteria                                                                               |
|---------------------|------------------------------------------------------------------------------------------------------------------------------------------------------------------------------------------------------------------------------------------------------------------------------------------------------------------------------------------------------------------------------------------------------------------------------------------------------------------------------------------------------------------------------------------------------|--------------------------------------------------------------------------------------------------|
| <b>Population</b>   |                                                                                                                                                                                                                                                                                                                                                                                                                                                                                                                                                      |                                                                                                  |
| Age                 | 65 years and older (also include studies addressing adults in general, if data for older adults is reported separately).                                                                                                                                                                                                                                                                                                                                                                                                                             | Children, adolescents, young and middle aged adults.                                             |
| Disease             | Healthy, Under/overweight, or obese                                                                                                                                                                                                                                                                                                                                                                                                                                                                                                                  | Studies restricted to specific diseases, conditions, or metabolic disorders                      |
| <b>Intervention</b> |                                                                                                                                                                                                                                                                                                                                                                                                                                                                                                                                                      |                                                                                                  |
| Dietary             | <ul style="list-style-type: none"> <li>Consumption of sustainable proteins and diets, plant-based proteins, vegan, vegetarian, Mediterranean, legumes or pulses, soy, wheat, vegetables, potatoes, beans, peas, quinoa, amaranth, buckwheat, rapeseed oil, edible insects, algae (seaweed), microalgae (spirulina), aquatic plants (duckweed).</li> <li>Decreased consumption of red meat with increased consumption of sustainable proteins</li> <li>Educational or public health policy that increases consumption of sustainable diets</li> </ul> | No dietary intervention or a dietary intervention that isn't considered sustainable/plant based. |
| Non-dietary         | Intervention of other lifestyle component, e.g., physical activity but must include sustainable diet component.                                                                                                                                                                                                                                                                                                                                                                                                                                      | Intervention that isn't lifestyle related                                                        |
|                     | 2 weeks or more                                                                                                                                                                                                                                                                                                                                                                                                                                                                                                                                      | Less than 2 weeks                                                                                |

|                          |                                                                                                                                                                                                                                                                                                                                                                                                                                                                                                                                                                                                                                                                                       |                                                                                                                       |
|--------------------------|---------------------------------------------------------------------------------------------------------------------------------------------------------------------------------------------------------------------------------------------------------------------------------------------------------------------------------------------------------------------------------------------------------------------------------------------------------------------------------------------------------------------------------------------------------------------------------------------------------------------------------------------------------------------------------------|-----------------------------------------------------------------------------------------------------------------------|
| Intervention period      |                                                                                                                                                                                                                                                                                                                                                                                                                                                                                                                                                                                                                                                                                       |                                                                                                                       |
| <b>Comparators</b>       | <ul style="list-style-type: none"> <li>• Low intake of sustainable or plant-based proteins</li> <li>• High intake of animal-based proteins</li> <li>• Certain type of diet (western)</li> <li>• No educational or policy that increase consumption of sustainable diets</li> </ul>                                                                                                                                                                                                                                                                                                                                                                                                    |                                                                                                                       |
| <b>Outcomes</b>          | <ul style="list-style-type: none"> <li>• Nutrient intake</li> <li>• Food group intake</li> <li>• Gut microbiome status</li> <li>• Health status</li> </ul>                                                                                                                                                                                                                                                                                                                                                                                                                                                                                                                            |                                                                                                                       |
| <b>Settings</b>          | <ul style="list-style-type: none"> <li>• Community dwelling</li> </ul>                                                                                                                                                                                                                                                                                                                                                                                                                                                                                                                                                                                                                | <ul style="list-style-type: none"> <li>• Hospital</li> <li>• Care home/residential care</li> </ul>                    |
| <b>Date and language</b> | No restrictions                                                                                                                                                                                                                                                                                                                                                                                                                                                                                                                                                                                                                                                                       |                                                                                                                       |
| <b>Study design</b>      | <ul style="list-style-type: none"> <li>• RCTs (including cluster RCTs)</li> <li>• Controlled (non-randomized) clinical trials</li> <li>• Cluster trials</li> <li>• Interrupted time series (ITS) studies with at least three data points before and after the intervention</li> <li>• Controlled before-after (CBA) studies prospective and retrospective comparative cohort studies</li> <li>• Observational studies</li> <li>• Cross-sectional studies</li> <li>• Case-control or nested case-control studies</li> </ul> <p>Cluster randomized, cluster non-randomized, or CBA studies will be included only if there are at least two intervention sites and two control sites</p> | <ul style="list-style-type: none"> <li>• Case series</li> <li>• Case reports</li> <li>• Studies in animals</li> </ul> |

**Supplementary Table S3:** Database names and dates of coverage

| Database                    | Coverage       |
|-----------------------------|----------------|
| Ovid                        |                |
| Medline                     | 1946 – present |
| APA PsycInfo                | 1806 – present |
| EBM Reviews – Cochrane CRCT | July 23        |
| Embase                      | 1974 – present |
| EBSCOhost                   |                |
| CINAHL Plus                 | 1937 – present |
| Clarivate                   |                |
| Web of Science              | 1900 – present |

**Supplementary Figure S1: Search strategies for all databases and trial registries**

Medline, PsycInfo, EBM Reviews (Cochrane Central Registry of Controlled trials), and Embase (Ovid platform)

1. (Proteins or Dietary Proteins or Plant Proteins or Plant Proteins Dietary or Soy Proteins or Soybean Proteins or Animal protein or Fruit Proteins or Grain Proteins or Nut Proteins or Pea Proteins or Plants Edible).mp. [mp=title, book title, abstract, original title, name of substance word, subject heading word, floating sub-heading word, keyword heading word, organism supplementary concept word, protocol supplementary concept word, rare disease supplementary concept word, unique identifier, synonyms, population supplementary concept word, anatomy supplementary concept word]
2. (diet, vegetarian or Diet, vegan or Diet, Mediterranean or Diet, plant-based).mp.
3. (plant-based protein or meat-based protein or dairy-based protein or seafood-based protein or insect-based protein or single-cell protein or in vitro meat-based protein or cultured meat or in vitro meat or synthetic meat).mp.
4. (sustainable or sustainable diet\* or alternative diet\*).mp.
5. (older\* or ageing or ageing or over 50 or elderly or aged).mp.
6. (gut health or microbiome or microbiota or gastrointestinal microbiome).mp.
7. 1 or 2 or 3 or 4
8. 5 and 6 and 7
9. limit 8 to humans

CINAHL Plus (EBSCOhost platform)

1. TX Proteins or Dietary Proteins or Plant Proteins or Plant Proteins Dietary or Soy Proteins or Soybean Proteins or Animal protein or Fruit Proteins or Grain Proteins or Nut Proteins or Pea Proteins or Plants Edible
2. TX diet, vegetarian or Diet, vegan or Diet, Mediterranean or Diet, plant-based
3. TX plant-based protein or meat-based protein or dairy-based protein or seafood-based protein or insect-based protein or single-cell protein or in vitro meat-based protein or cultured meat or in vitro meat or synthetic meat
4. TX sustainable or sustainable diet\* or alternative diet\*
5. TX older\* or ageing or ageing or over 50 or elderly or aged
6. TX gut health or microbiome or microbiota or gastrointestinal microbiome
7. S1 OR S2 OR S3 OR S4
8. S5 AND S6 AND S7

Web of Science (Clarivate platform)

1. ALL=(Proteins or Dietary Proteins or Plant Proteins or Plant Proteins Dietary or Soy Proteins or Soybean Proteins or Animal protein or Fruit Proteins or Grain Proteins or Nut Proteins or Pea Proteins or Plants Edible)
2. ALL=(diet, vegetarian or Diet, vegan or Diet, Mediterranean or Diet, plant-based)
3. ALL=(plant-based protein or meat-based protein or dairy-based protein or seafood-based protein or insect-based protein or single-cell protein or in vitro meat-based protein or cultured meat or in vitro meat or synthetic meat)
4. ALL=(sustainable or sustainable diet\* or alternative diet\*)
5. ALL=(older\* or ageing or ageing or over 50 or elderly or aged)
6. ALL=(gut health or microbiome or microbiota or gastrointestinal microbiome)
7. #1 OR #2 OR #3 OR #4
8. #5 AND #6 AND #7
9. #5 AND #6 AND #7 and Veterinary Sciences or Zoology (Exclude – Research Areas) and 3.51 Dairy & Animal Sciences or 3.232 Veterinary Sciences or 3.35 Zoology & Animal Ecology or 3.274 Animal Sensing (Exclude – Citation Topics Meso)

#### ISRCTN registry

- Search terms: Plant proteins OR sustainable
- Age range: Adult

#### ClinicalTrials.gov

- Condition or disease: Gut health OR Microbiota OR Microbiome
- Intervention/Treatment: Sustainable diet OR Plant protein
- Sex: All
- Age: Older adult (65+)

**Supplementary Table S4: Health status outcomes**

| Author, Year | BMI (kg/m <sup>2</sup> )                                                                                                                                                                                                                                                           | Self-rated health, n (%)                                                                                                                                                                                                                                               | Non-communicable diseases, n (%)                                                                                                                                                                                                                                    | Cholesterol                                                                                                                                                                                                          | Muscle mass (kg) | Grip strength (kg) |
|--------------|------------------------------------------------------------------------------------------------------------------------------------------------------------------------------------------------------------------------------------------------------------------------------------|------------------------------------------------------------------------------------------------------------------------------------------------------------------------------------------------------------------------------------------------------------------------|---------------------------------------------------------------------------------------------------------------------------------------------------------------------------------------------------------------------------------------------------------------------|----------------------------------------------------------------------------------------------------------------------------------------------------------------------------------------------------------------------|------------------|--------------------|
| André, 2021  | By tertile of 3-OH FAs<br>n (%):<br>Under wt, <18.5:<br>Total: 6 (0.9)<br>T1: 0 (0.0)<br>T2: 1 (0.4)<br>T3: 5 (2.2)<br><br>Normal wt, 18.5–25:<br>Total: 264 (37.8)<br>T1: 98 (42.2)<br>T2: 84 (36.1)<br>T3: 82 (35.2)<br><br>Over wt, >25:<br>Total: 428 (61.3)<br>T1: 134 (57.8) | By tertile of 3-OH FAs<br><br>Good/very good:<br>Total: 21 (3)<br>T1: 7 (3.0)<br>T2: 7 (3.0)<br>T3: 7 (3.0)<br><br>Intermediate:<br>Total: 239 (34.2)<br>T1: 85 (36.6)<br>T2: 78 (33.5)<br>T3: 76 (32.6)<br><br>Poor/very poor:<br>Total: 438 (62.8)<br>T1: 140 (60.3) | By tertile of 3-OH FAs<br><br>Diabetes:<br>Total: 50 (7.2)<br>T1: 8 (3.5)<br>T2: 11 (4.7)<br>T3: 31 (13.3)<br><br>Met syndrome:<br>Total: 102 (14.9)<br>T1: 26 (11.4)<br>T2: 29 (12.7)<br>T3: 47 (20.7)<br><br>Hypertension:<br>Total: 529 (75.8)<br>T1: 168 (72.4) | By tertile of 3-OH FAs<br><br>Mean (SD), (Mmol/L):<br>LDL:<br>Total: 3.6 (0.9)<br>T1: 3.6 (0.8)<br>T2: 3.6 (0.8)<br>T3: 3.7 (0.9)<br><br>HDL:<br>Total: 1.6 (0.4)<br>T1: 1.6 (0.4)<br>T2: 1.6 (0.4)<br>T3: 1.6 (0.4) | Not reported     | Not reported       |

|                        |                                                                                                                                                                                                                                                                                                                                           |                                                                                             |                                                                                                                                                                                                                                                                                               |              |                                                                                                |                                                                                                |
|------------------------|-------------------------------------------------------------------------------------------------------------------------------------------------------------------------------------------------------------------------------------------------------------------------------------------------------------------------------------------|---------------------------------------------------------------------------------------------|-----------------------------------------------------------------------------------------------------------------------------------------------------------------------------------------------------------------------------------------------------------------------------------------------|--------------|------------------------------------------------------------------------------------------------|------------------------------------------------------------------------------------------------|
|                        | T2: 148 (63.5)<br>T3: 146 (62.6)                                                                                                                                                                                                                                                                                                          | T2: 148 (63.5)<br>T3: 150 (64.4)                                                            | T2: 174 (74.7)<br>T3: 187 (80.3)<br><br>Cardio diseases:<br>Total: 55 (7.9)<br>T1: 12 (5.2)<br>T2: 18 (7.7)<br>T3: 25 (10.7)<br><br>Depression:<br>Total: 42 (6.0)<br>T1: 16 (6.9)<br>T2: 14 (6.0)<br>T3: 12 (5.2)                                                                            |              |                                                                                                |                                                                                                |
| Farsijani, 2022        | By quartile, mean (SD):<br>Q1: 27.0 (3.8)<br>Q2: 27.1 (3.7)<br>Q3: 27.1 (3.6)<br>Q4: 26.8 (4.0)                                                                                                                                                                                                                                           | By quartile, Excellent:<br>Q1: 75 (38.7)<br>Q2: 69 (35.8)<br>Q3: 68 (35.1)<br>Q4: 68 (35.1) | By quartile, Diabetes:<br>Q1: 22 (11.3)<br>Q2: 28 (14.5)<br>Q3: 34 (17.5)<br>Q4: 31 (16.0)<br><br>Hypertension:<br>Q1: 98 (50.5)<br>Q2: 98 (50.8)<br>Q3: 106 (54.6)<br>Q4: 101 (52)<br><br>Depression score (0-15):<br>Q1: 1.8 (2.0)<br>Q2: 1.7 (1.8)<br>Q3: 1.8 (1.8)<br>Q4: 1.4 (1.8)       | Not reported | By quartile, Mean (SD)<br>Q1: 49.1 (5.6)<br>Q2: 58.6 (1.6)<br>Q3: 64.3 (1.9)<br>Q4: 76.0 (7.0) | By quartile, Mean (SD)<br>Q1: 36.4 (7.9)<br>Q2: 36.0 (7.4)<br>Q3: 35.8 (7.6)<br>Q4: 35.9 (7.6) |
| Ghosh, 2020            | Median (min-max) at baseline<br><br>Control:<br>26.8 (18.8 - 44.6)<br>Diet group:<br>26.9 (18.5 - 46.0)                                                                                                                                                                                                                                   | Not reported                                                                                | Not reported                                                                                                                                                                                                                                                                                  | Not reported | Not reported                                                                                   | Not reported                                                                                   |
| Li, 2021               | By quintile, mean (SD):<br>Q1: 26.2 (4.0)<br>Q2: 25.6 (3.4)<br>Q3: 24.5 (3.6)<br>Q4: 24.8 (2.5)<br>Q5: 23.9 (3.1)                                                                                                                                                                                                                         | Not reported                                                                                | Not reported                                                                                                                                                                                                                                                                                  | Not reported | Not reported                                                                                   | Not reported                                                                                   |
| Maroto-Rodriguez, 2022 | By tertile, n (%)<br>T1:<br><25: 71 (16.55)<br>25-29.9: 212 (49.42)<br>≥30: 146 (34.03)<br><br>T2:<br><25: 150 (19.61)<br>25-29.9: 391 (51.11)<br>≥30: 334 (48.69)<br><br>T3:<br><25: 147 (21.43)<br>25-29.9: 334 (48.69)<br>≥30: 205 (29.88)<br><br>Total sample, n (%):<br><25: 368 (19.57)<br>25-29.9: 937 (49.69)<br>≥30: 575 (30.59) | Not reported                                                                                | By tertile, Cardio disease:<br>T1: 22 (5.13)<br>T2: 39 (5.10)<br>T3: 36 (5.25)<br><br>Type 2 diabetes:<br>T1: 74 (17.25)<br>T2: 117 (15.29)<br>T3: 93 (13.56)<br><br>Cancer:<br>T1: 9 (2.10)<br>T2: 13 (1.70)<br>T3: 12 (1.75)<br><br>Chronic lung disease:<br>T1: 24 (5.59)<br>T2: 68 (8.89) | Not reported | Not reported                                                                                   | Not reported                                                                                   |

|                    |                                                                                                                                                                                                                                                          |                                                                                                                                                                                                                                                                      |                                                                                                                                                                                                                                                           |                                                                                                                                           |              |              |
|--------------------|----------------------------------------------------------------------------------------------------------------------------------------------------------------------------------------------------------------------------------------------------------|----------------------------------------------------------------------------------------------------------------------------------------------------------------------------------------------------------------------------------------------------------------------|-----------------------------------------------------------------------------------------------------------------------------------------------------------------------------------------------------------------------------------------------------------|-------------------------------------------------------------------------------------------------------------------------------------------|--------------|--------------|
|                    |                                                                                                                                                                                                                                                          |                                                                                                                                                                                                                                                                      | T3: 51 (7.43)<br><br>Depression:<br>T1: 33 (7.69)<br>T2: 51 (6.67)<br>T3: 54 (7.87)                                                                                                                                                                       |                                                                                                                                           |              |              |
| Maskarinec, 2019   | By tertile, mean (SD)<br>HEI-2020<br>T1: 21.9 (4.9)<br>T3: 26.6 (4.6)<br><br>AHEI-2010<br>T1: 29.1 (5.0)<br>T3: 26.7 (4.5)<br><br>aMED<br>T1: 28.6 (5.0)<br>T3: 27.3 (4.7)<br><br>DASH<br>T1: 29.0 (5.0)<br>T3: 23.5 (8.6)                               | Not reported                                                                                                                                                                                                                                                         | History of diabetes:<br>HEI-2020<br>T1: 214 (37)<br>T3: 168 (29)<br><br>AHEI-2010<br>T1: 197 (34)<br>T3: 156 (27)<br><br>aMED<br>T1: 276 (43)<br>T3: 116 (25)<br><br>DASH<br>T1: 240 (38)<br>T3: 140 (25)                                                 | Not reported                                                                                                                              | Not reported | Not reported |
| Shikany, 2019      | By quartile, mean (SD)<br><br>Western diet<br>Total: 26.9 (3.7)<br>Q1: 26.0 (3.4)<br>Q2: 26.5 (3.6)<br>Q3: 27.4 (4.0)<br>Q4: 27.9 (3.6)<br><br>Prudent diet<br>Total: 26.9 (3.7)<br>Q1: 27.3 (3.5)<br>Q2: 27.3 (3.6)<br>Q3: 27.1 (4.0)<br>Q4: 26.0 (3.7) | By quartile, excellent health n(%)<br><br>Western diet<br>Total: 464 (89.7)<br>Q1: 120 (92.3)<br>Q2: 115 (89.2)<br>Q3: 120 (93.0)<br>Q4: 109 (84.5)<br><br>Prudent diet<br>Total: 467 (89.3)<br>Q1: 114 (87.7)<br>Q2: 121 (93.8)<br>Q3: 116 (89.9)<br>Q4: 113 (87.6) | History of multimorbidity, n(%)<br><br>Western diet<br>Total: 322 (62.3)<br>Q1: 77 (59.2)<br>Q2: 80 (62.0)<br>Q3: 80 (62.0)<br>Q4: 85 (65.9)<br><br>Prudent diet<br>Total: 322 (62.3)<br>Q1: 81 (62.3)<br>Q2: 92 (71.3)<br>Q3: 69 (53.5)<br>Q4: 80 (62.0) | Not reported                                                                                                                              | Not reported | Not reported |
| Trichopoulou, 2003 | Not reported                                                                                                                                                                                                                                             | Not reported                                                                                                                                                                                                                                                         | >65 years sub-group, No. of deaths/No. of person years:<br>Med T1: 80/5836<br>Med T2: 62/6889<br>Med T3: 32/3558<br><br>>55 years sub-group, No. of deaths/No. of participants:<br>229/9398                                                               | Not reported                                                                                                                              | Not reported | Not reported |
| Zhang, 2021        | By timepoint, mean (SD)<br>Baseline: 24.0 (2.8)<br>Month 2: 24.3 (3.1)<br>Month 4: 24.3 (3.2)                                                                                                                                                            | Not reported                                                                                                                                                                                                                                                         | Not reported                                                                                                                                                                                                                                              | At baseline, month 2 and month 4, mean (SD) (mg/dL)<br><br>Total cholesterol:<br>185.1 (42.0)<br>191.9 (46.4)<br>191.8 (37.5)<br><br>LDL: | Not reported | Not reported |



|  |  |  |  |                                                                                                       |  |  |
|--|--|--|--|-------------------------------------------------------------------------------------------------------|--|--|
|  |  |  |  | 102.0 (34.7)<br>110.3 (38.3)<br>103.2 (30.0)<br><br>HDL:<br>61.2 (12.1)<br>68.4 (12.4)<br>61.8 (14.8) |  |  |
|--|--|--|--|-------------------------------------------------------------------------------------------------------|--|--|

*wt: weight, Met: Metabolic, Q: quintile/quartile, Cardio: Cardiovascular, T: tertile, HEI-2010: Healthy Eating Index 2010, AHEI-2010: Alternative Healthy Eating Index 2010, aMED: Alternate Mediterranean Diet, DASH diet: Dietary Approaches to Stop Hypertension Trial diet, No.: number,*
